# Supplementary material
Source: PubMed Central journal article supplement (PMC4216514)
Supplement: Supp_Figure1.pdf [file Supp_Figure1.pdf]

## Supplementary Data

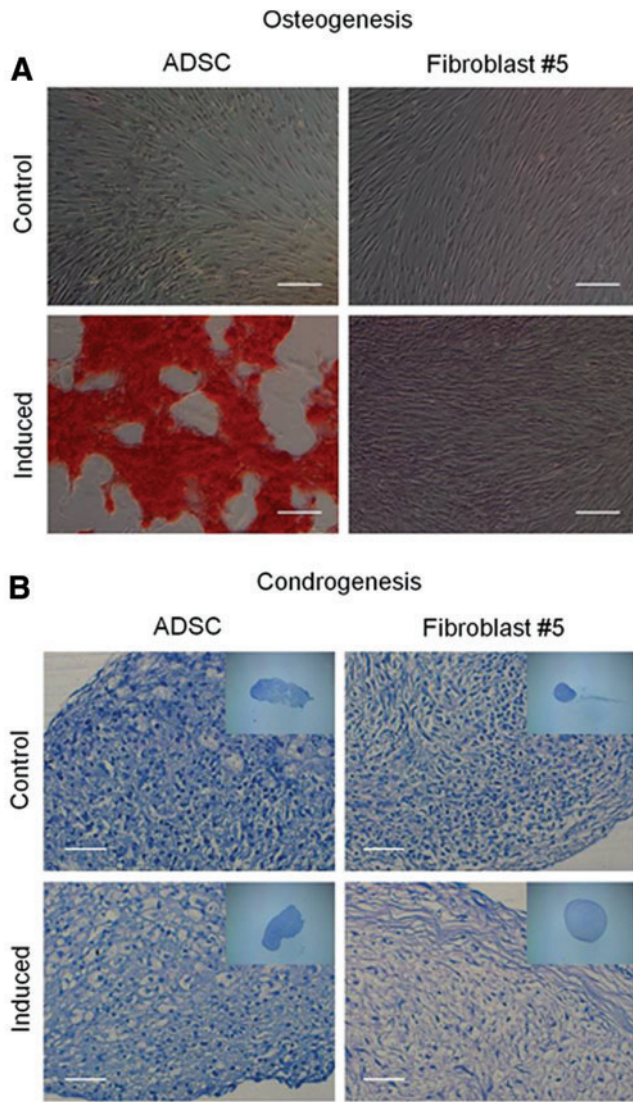

**SUPPLEMENTARY FIG. S1.** Osteogenic and chondrogenic differentiation of ADSCs and fibroblasts. **(A)** ADSCs and fibroblasts cultures at passages P5 induced to differentiate into osteoblasts after 21 days. Cells were stained with Alizarin Red S. The bar indicates 200  $\mu\text{m}$ . **(B)** ADSCs and fibroblasts micromass cultures at passages P5 induced to differentiate into chondroblasts after 21 days. Slides were stained with Toluidine blue. The scale bar indicates 50  $\mu\text{m}$ . ADSCs, adipose-derived stromal cells.
