# Supplementary material
Source: PubMed Central journal article supplement (PMC4216514)
Supplement: Supp_Figure2.pdf [file Supp_Figure2.pdf]

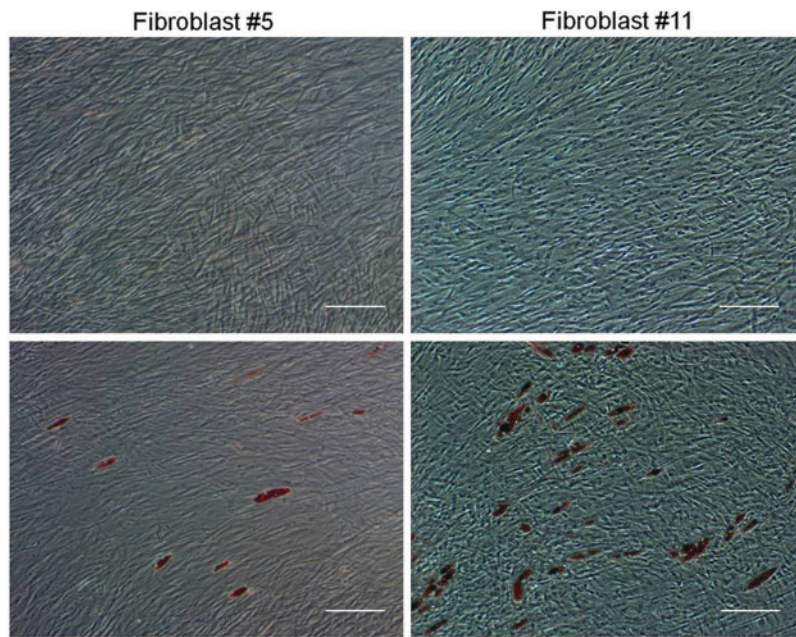

**SUPPLEMENTARY FIG. S2.** Fibroblast cultures at passages P5 and P11 induced to differentiate into adipocytes after 21 days. Untreated control cultures are shown on the *upper line* of photographs. The scale bar indicates 200  $\mu\text{m}$ .
