# Supplementary material
Source: PubMed Central journal article supplement (PMC4216514)
Supplement: Supp_Figure3.pdf [file Supp_Figure3.pdf]

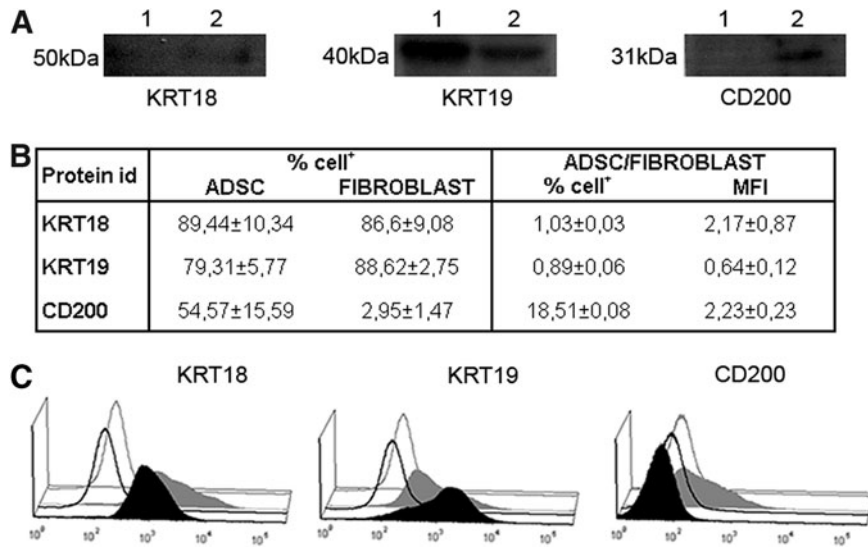

**SUPPLEMENTARY FIG. S3.** Immunophenotypes of ADSCs and fibroblasts. **(A)** Western blot analysis of keratin 18 (KRT18), keratin 19 (KRT19), and CD200 receptor 1 (CD200) on fibroblast (lane 1) and ADSC (lane 2) lysates. **(B)** Flow cytometry data for KRT18, KRT19, and CD200. Columns show the percentage of positive cells ( $\pm$  standard deviation) on ADSC or fibroblast populations and the percentage of positive cells or the mean fluorescence intensity (MFI) of the ADSC/fibroblast ratio. **(C)** Representative histograms of the flow cytometry analysis. Fibroblasts (*black lines*) and ADSCs (*gray lines*) were labeled with antibodies against the indicated antigens. Isotype controls are shown as *empty lines/areas*, and the *solid histograms* indicate reactivity with the antibody.
