# Supplementary material
Source: PubMed Central journal article supplement (PMC4216514)
Supplement: Supp_Figure4.pdf [file Supp_Figure4.pdf]

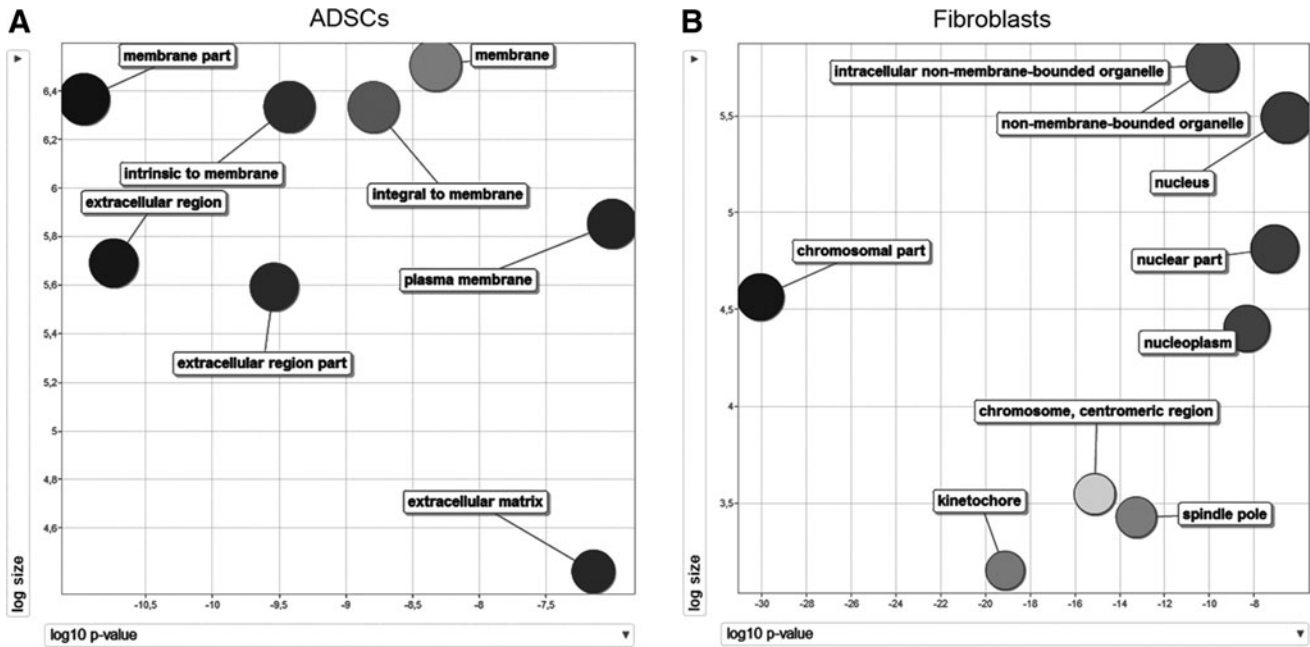

**SUPPLEMENTARY FIG. S4.** GO analyses for cellular component terms in ADSCs (A) and fibroblasts (B). REVIGO visualization of the GO analyses with GOrilla is shown. The log<sub>10</sub> of the *P* value of each GO after REVIGO analyses is plotted on the x-axis, and the log<sub>10</sub> of the size of GOs is plotted on the y-axis. ADSC terms are relevant mainly to the plasma membrane and extracellular compartment. GO, gene ontology.
