# Supplementary material
Source: PubMed Central journal article supplement (PMC4216514)
Supplement: Supp_Table1.pdf [file Supp_Table1.pdf]

SUPPLEMENTARY TABLE S1. PRIMER SETS USED FOR REAL-TIME POLYMERASE CHAIN REACTION ANALYSIS

| <i>Gene</i>    | <i>Name</i>                                                | <i>Gene ID</i> | <i>Sequence</i>                                                  | <i>Amplicon<sup>a</sup> size (bp)</i> |
|----------------|------------------------------------------------------------|----------------|------------------------------------------------------------------|---------------------------------------|
| <i>ARPC2</i>   | Actin-related protein 2/3 complex, subunit 2, 34 kDa       | 10109          | Forward: CAGTGCTCGAGACAACACCA<br>Reverse: ACGTCTTCCCCGTGATTGTTT  | 188                                   |
| <i>CAMK2N1</i> | Calcium/calmodulin-dependent protein kinase II inhibitor 1 | 55450          | Forward: GGAGCAAGCGGGTTGTTATTG<br>Reverse: ACCGCCGTTCTTATTCTCTCC | 128                                   |
| <i>GAPDH</i>   | Glyceraldehyde-3-phosphate dehydrogenase                   | 2597           | Forward: GGCGATGCTGGCGCTGAGTAC<br>Reverse: TGGTTCACACCCATGACGA   | 150                                   |
| <i>RPL10A</i>  | Ribosomal protein L10a                                     | 4736           | Forward: TCTCTCGCGACACCCTGTA<br>Reverse: GTGGACTTAAGCCTGACGGT    | 160                                   |
| <i>SCRGI</i>   | Stimulator of chondrogenesis 1                             | 11341          | Forward: CTGCAAATCGCCTCTCTTGC<br>Reverse: AGAAAACGTCTTTTGGGCAGC  | 189                                   |
| <i>TMSB10</i>  | Thymosin beta 10                                           | 9168           | Forward: ACGAGACTGCACGGATTGTTT<br>Reverse: GGCGATGACGTAGAGGGAC   | 208                                   |

<sup>a</sup>Amplifications were performed using 60°C as annealing temperature and 45 cycles.
